# Supplementary material for: Nitrate limitation and ocean acidification interact with UV-B to reduce photosynthetic performance in the diatom Phaeodactylum tricornutum
Source: Copernicus journal article supplement (doi:10.5194/bg-12-2383-2015), 2015-04-23
Supplement: Supplementary file 1 [file bg-12-2383-2015-supplement.pdf]

Supplement of Biogeosciences, 12, 2383–2393, 2015  
<http://www.biogeosciences.net/12/2383/2015/>  
doi:10.5194/bg-12-2383-2015-supplement  
© Author(s) 2015. CC Attribution 3.0 License.

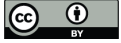

*Supplement of*

**Nitrate limitation and ocean acidification interact with UV-B to reduce photosynthetic performance in the diatom *Phaeodactylum tricornerutum***

W. Li et al.

Correspondence to: K. Gao (ksgao@xmu.edu.cn)

## Supplementary legends

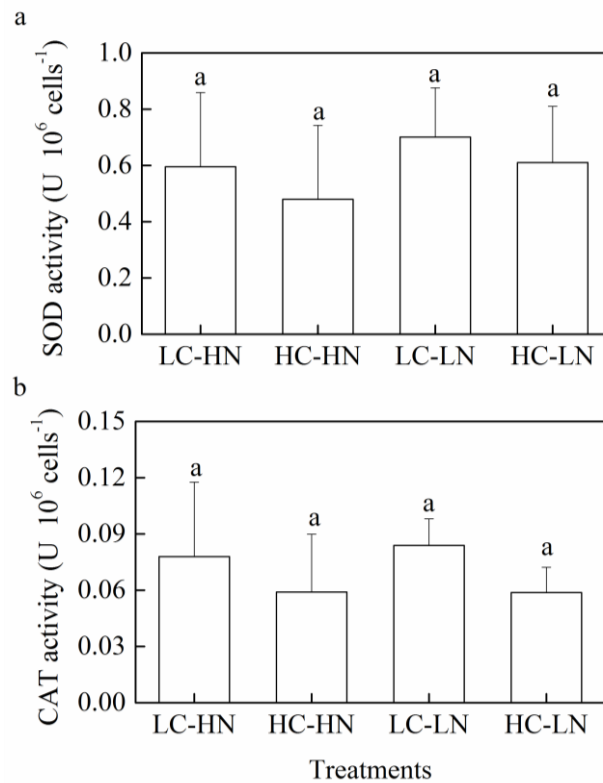

**Figure S1.** SOD (a) and CAT (b) activities (represented as units per 10<sup>6</sup> cells) of *P. tricornutum* grown at ambient (390  $\mu\text{atm}$ , LC) or elevated CO<sub>2</sub> (1000  $\mu\text{atm}$ , HC) under NO<sub>3</sub><sup>-</sup> replete (110  $\mu\text{mol L}^{-1}$ , HN) or limited (10  $\mu\text{mol L}^{-1}$ , LN). Except CAT value in HC-LN that had only 2 replicates, other treatments were at least 3 replicates (n=3-7).

## Supporting information

### SOD and CAT activities represented as per $10^6$ cells

When SOD and CAT were represented as per  $10^6$  cell, no significant differences were found between HN and LN treatments in both the LC (SOD,  $P = 0.5486$ ; CAT,  $P = 0.8119$ ) and HC (SOD,  $P = 0.4162$ ; CAT,  $P = 0.9876$ ) conditions. Though statistically no significant difference of SOD and CAT were found between HC and LC, it was worth mentioning that, HC treatments, the averaged SOD activity were decreased by 19.5% ( $P = 0.4259$ ) and 13.0% ( $P = 0.5573$ ), and decreased CAT activity by 24.2% ( $P = 0.3417$ ) and 30.0% ( $P = 0.1425$ ) in the HN and LN conditions, respectively, (Fig. S1).
